# Supplementary material
Source: PubMed Central journal article supplement (PMC6264799)
Supplement: NIHMS79483-supplement-Suppl_tables_and_figures.pdf [file NIHMS79483-supplement-Suppl_tables_and_figures.pdf]

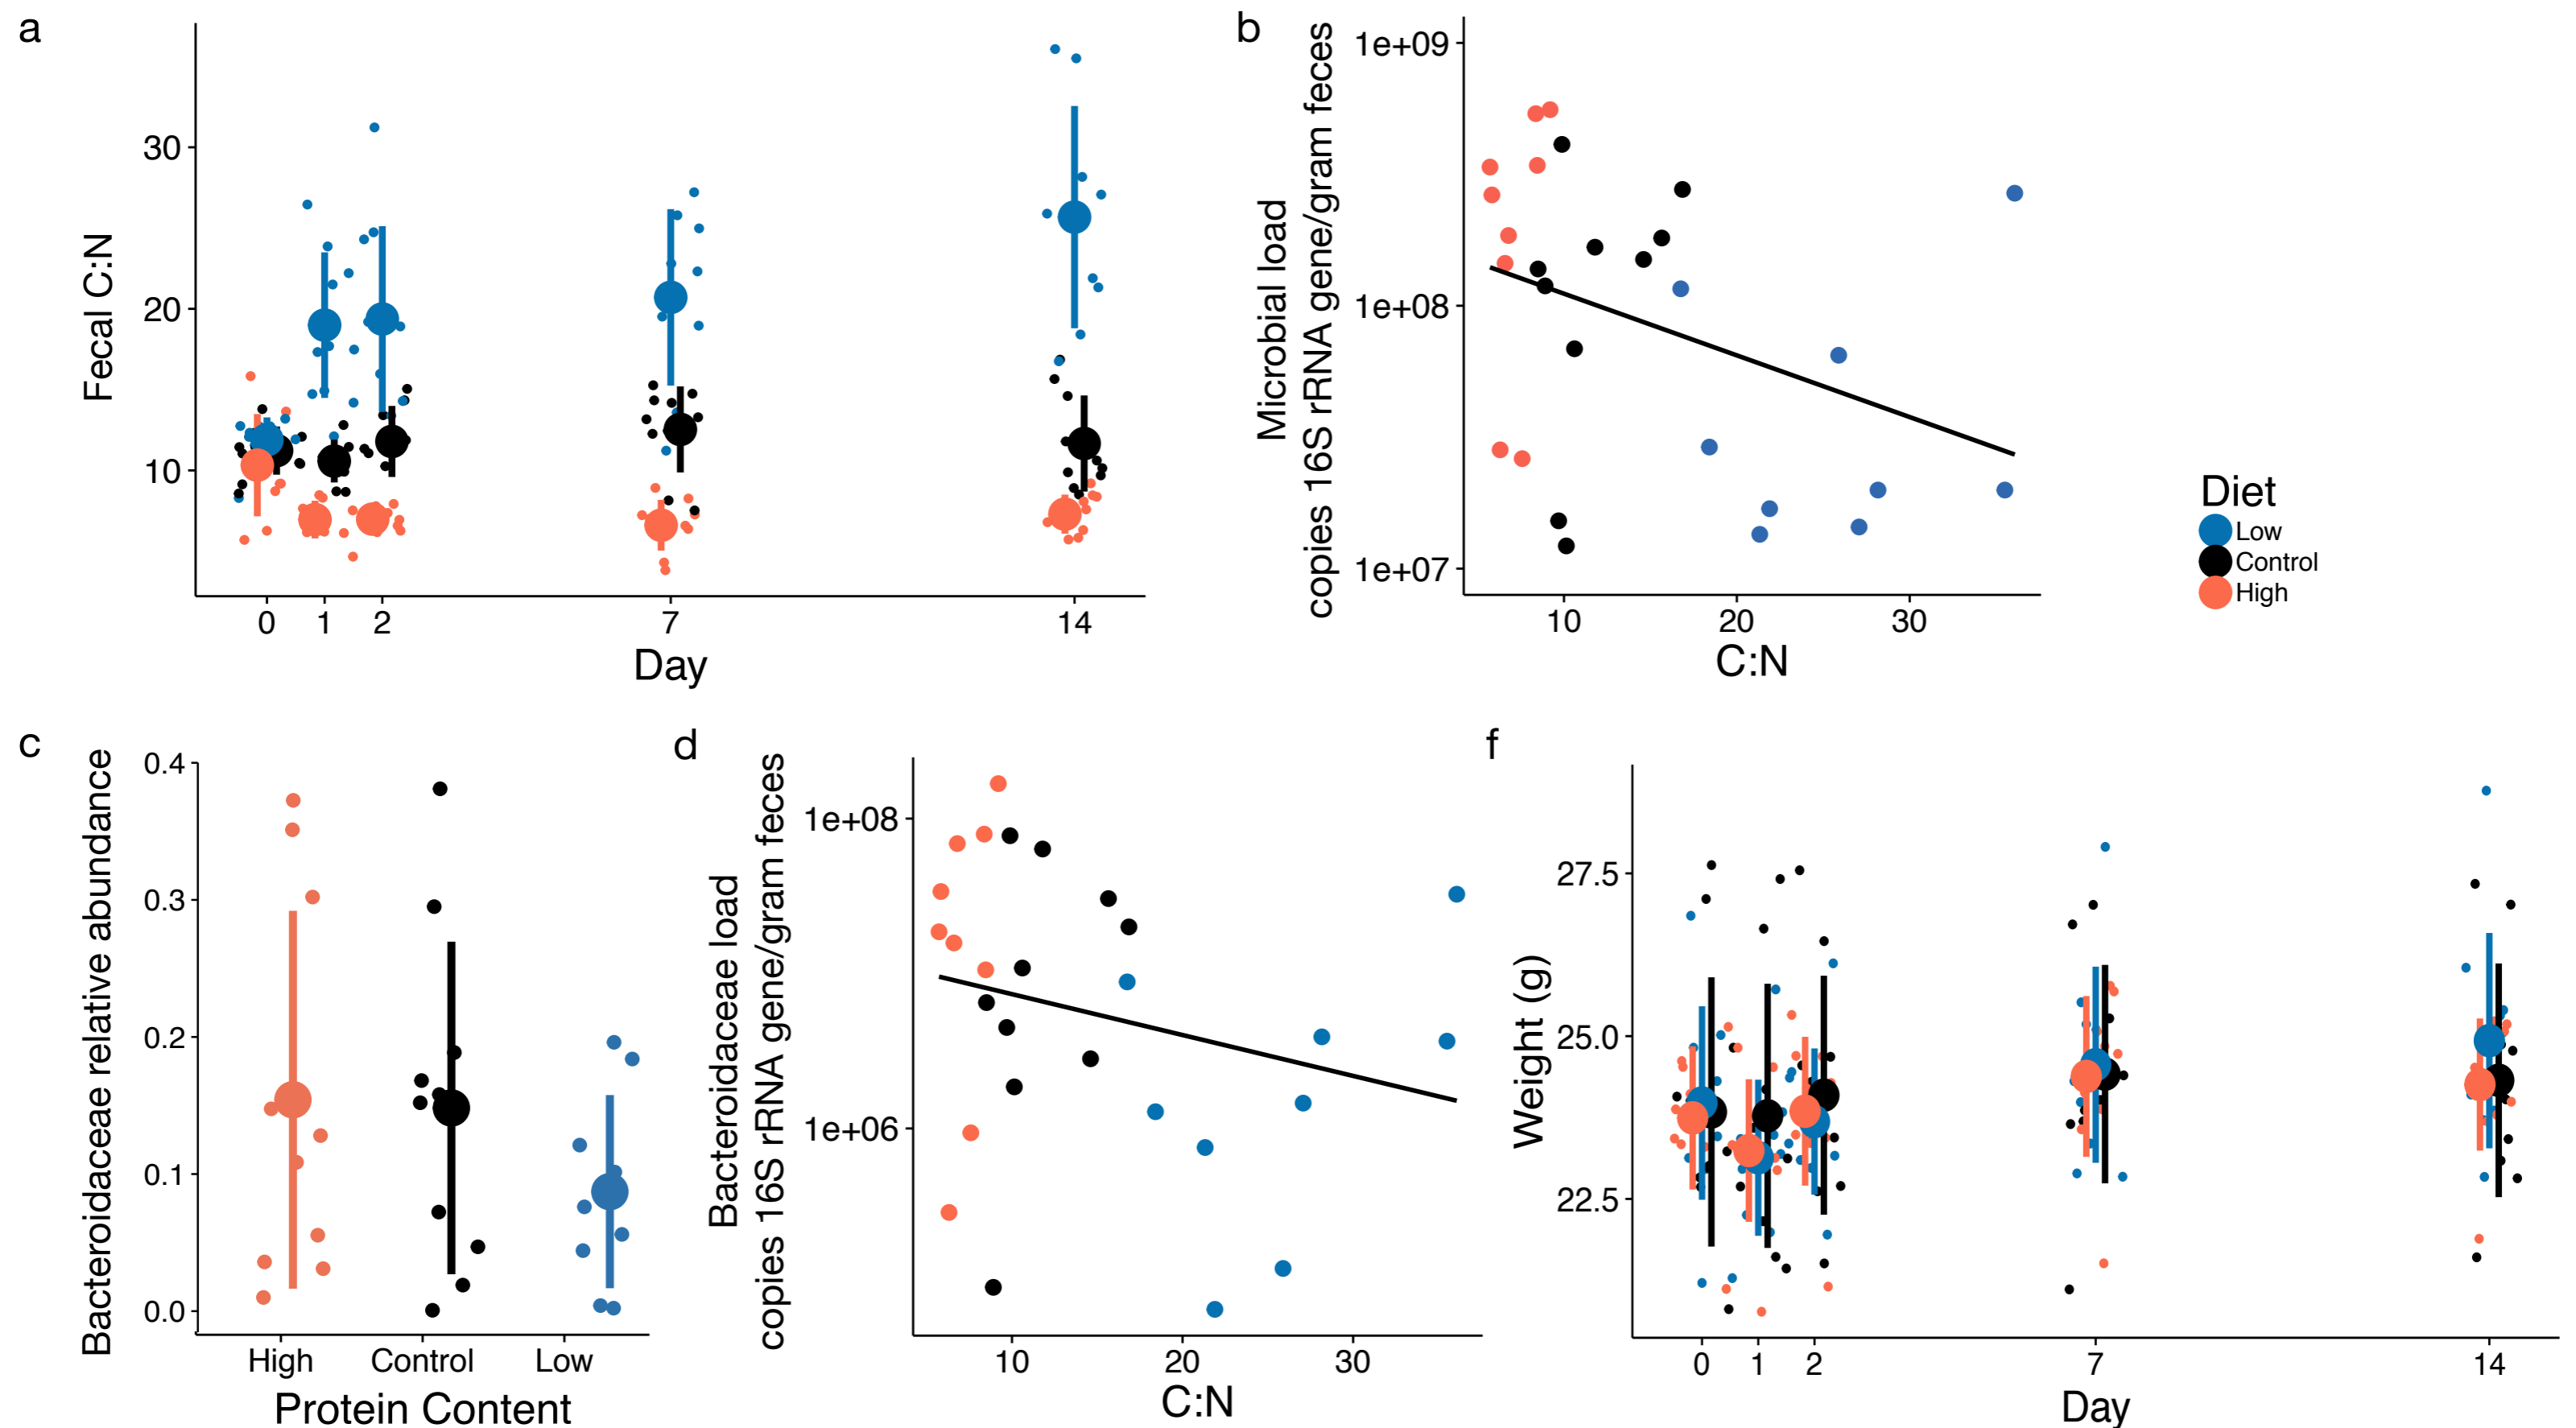

**Supplementary Figure 1 | Changing dietary protein content results in changes in C:N associated with some microbial shifts.** **a**, Fecal C:N changed under altered protein diets over 14 days ( $P < 2.2 \times 10^{-16}$ , linear mixed effects model likelihood tests;  $n=9-10$  mice per treatment group). **b**, Microbial load, estimated by 16S rRNA gene copy number measured via qPCR, was negatively correlated (linear regression shown) with fecal C:N on the final day of treatment ( $\rho=-0.4$ ,  $P=0.03$ , Spearman correlation;  $n=28$  mice) **c**, Bacteroidaceae relative abundance did not differ between treatment groups ( $P=0.58$ , Kruskal-Wallis test;  $n=9-10$  mice per treatment group). **d**, However, Bacteroidaceae absolute abundance (calculated as relative abundance multiplied by total copies 16S rRNA gene measured via qPCR) trended towards a negative correlation (linear regression shown) with fecal C:N on the last day of treatment ( $\rho=-0.29$ ,  $P=0.1$ , Spearman correlation;  $n=28$  mice). **f**, Mouse weight did not differ significantly between diet treatments ( $P=0.93$ , Kruskal-Wallis test;  $n=9-10$  mice per group). Large circles are means; bars show standard deviations.

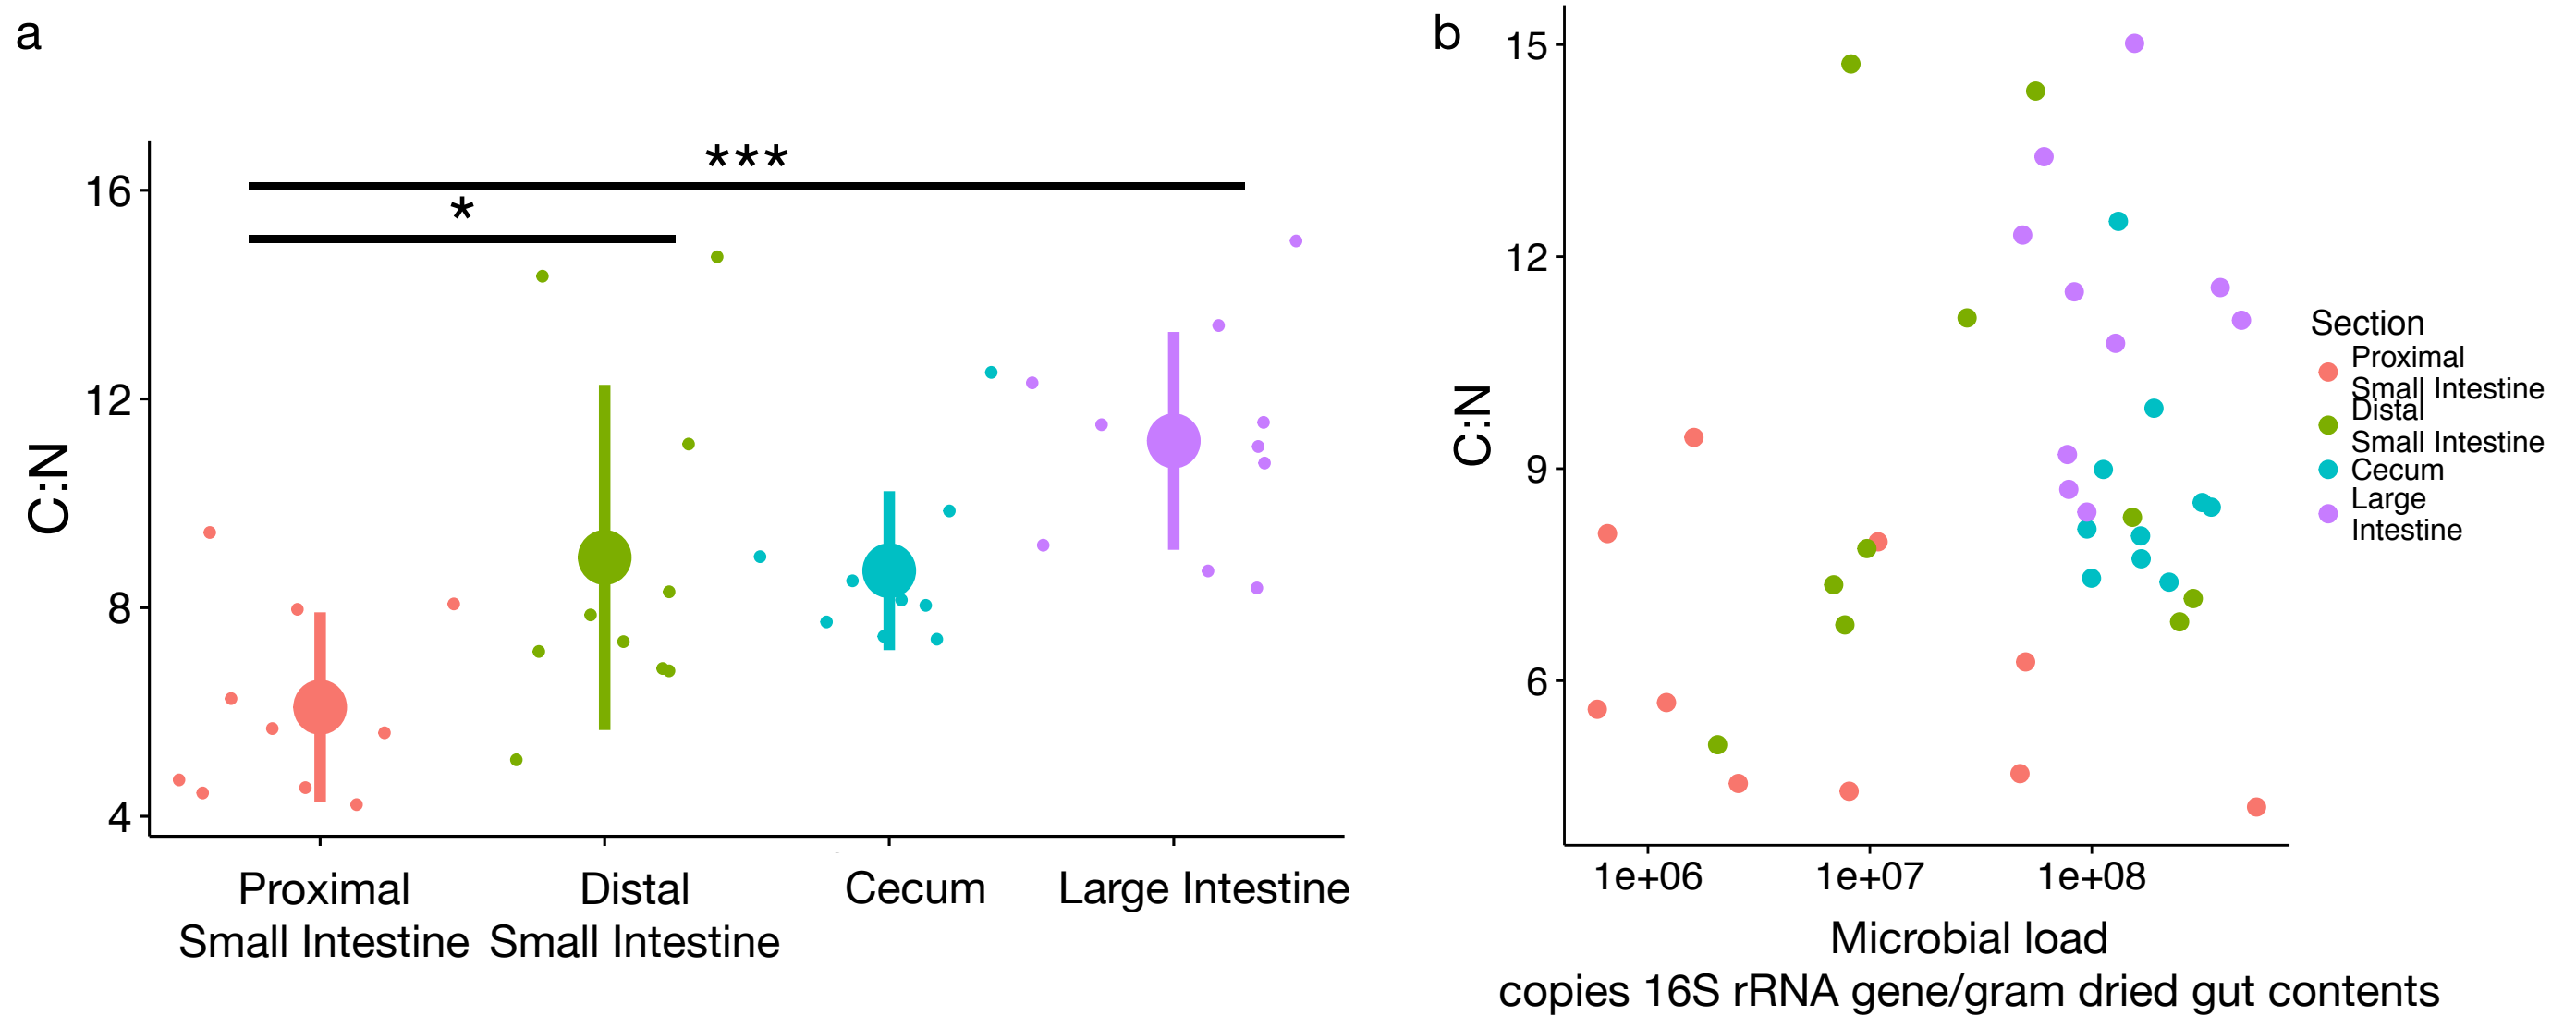

**Supplementary Figure 2 | C:N of digesta varies along the length of the gut but is not correlated with total microbial load.** **a**, C:N increased along the gut of mice under normal diets ( $P=0.05$  proximal small intestine compared to distal small intestine,  $P=0.0001$  proximal small intestine compared to large intestine, Tukey's Honestly Significant Difference test;  $n=10$  mice per compartment). Bars indicate groups which differed significantly (\*\*\*)  $P<0.001$ , \*  $P<0.05$ ). **b**, Microbial load, estimated by 16S rRNA gene copy number, was not significantly correlated with gut content C:N ( $\rho=0.24$ ,  $P=0.14$ , Spearman correlation;  $n=10$  per compartment) when analyzed across the entire mouse intestine. Large circles are means; bars show standard deviations.

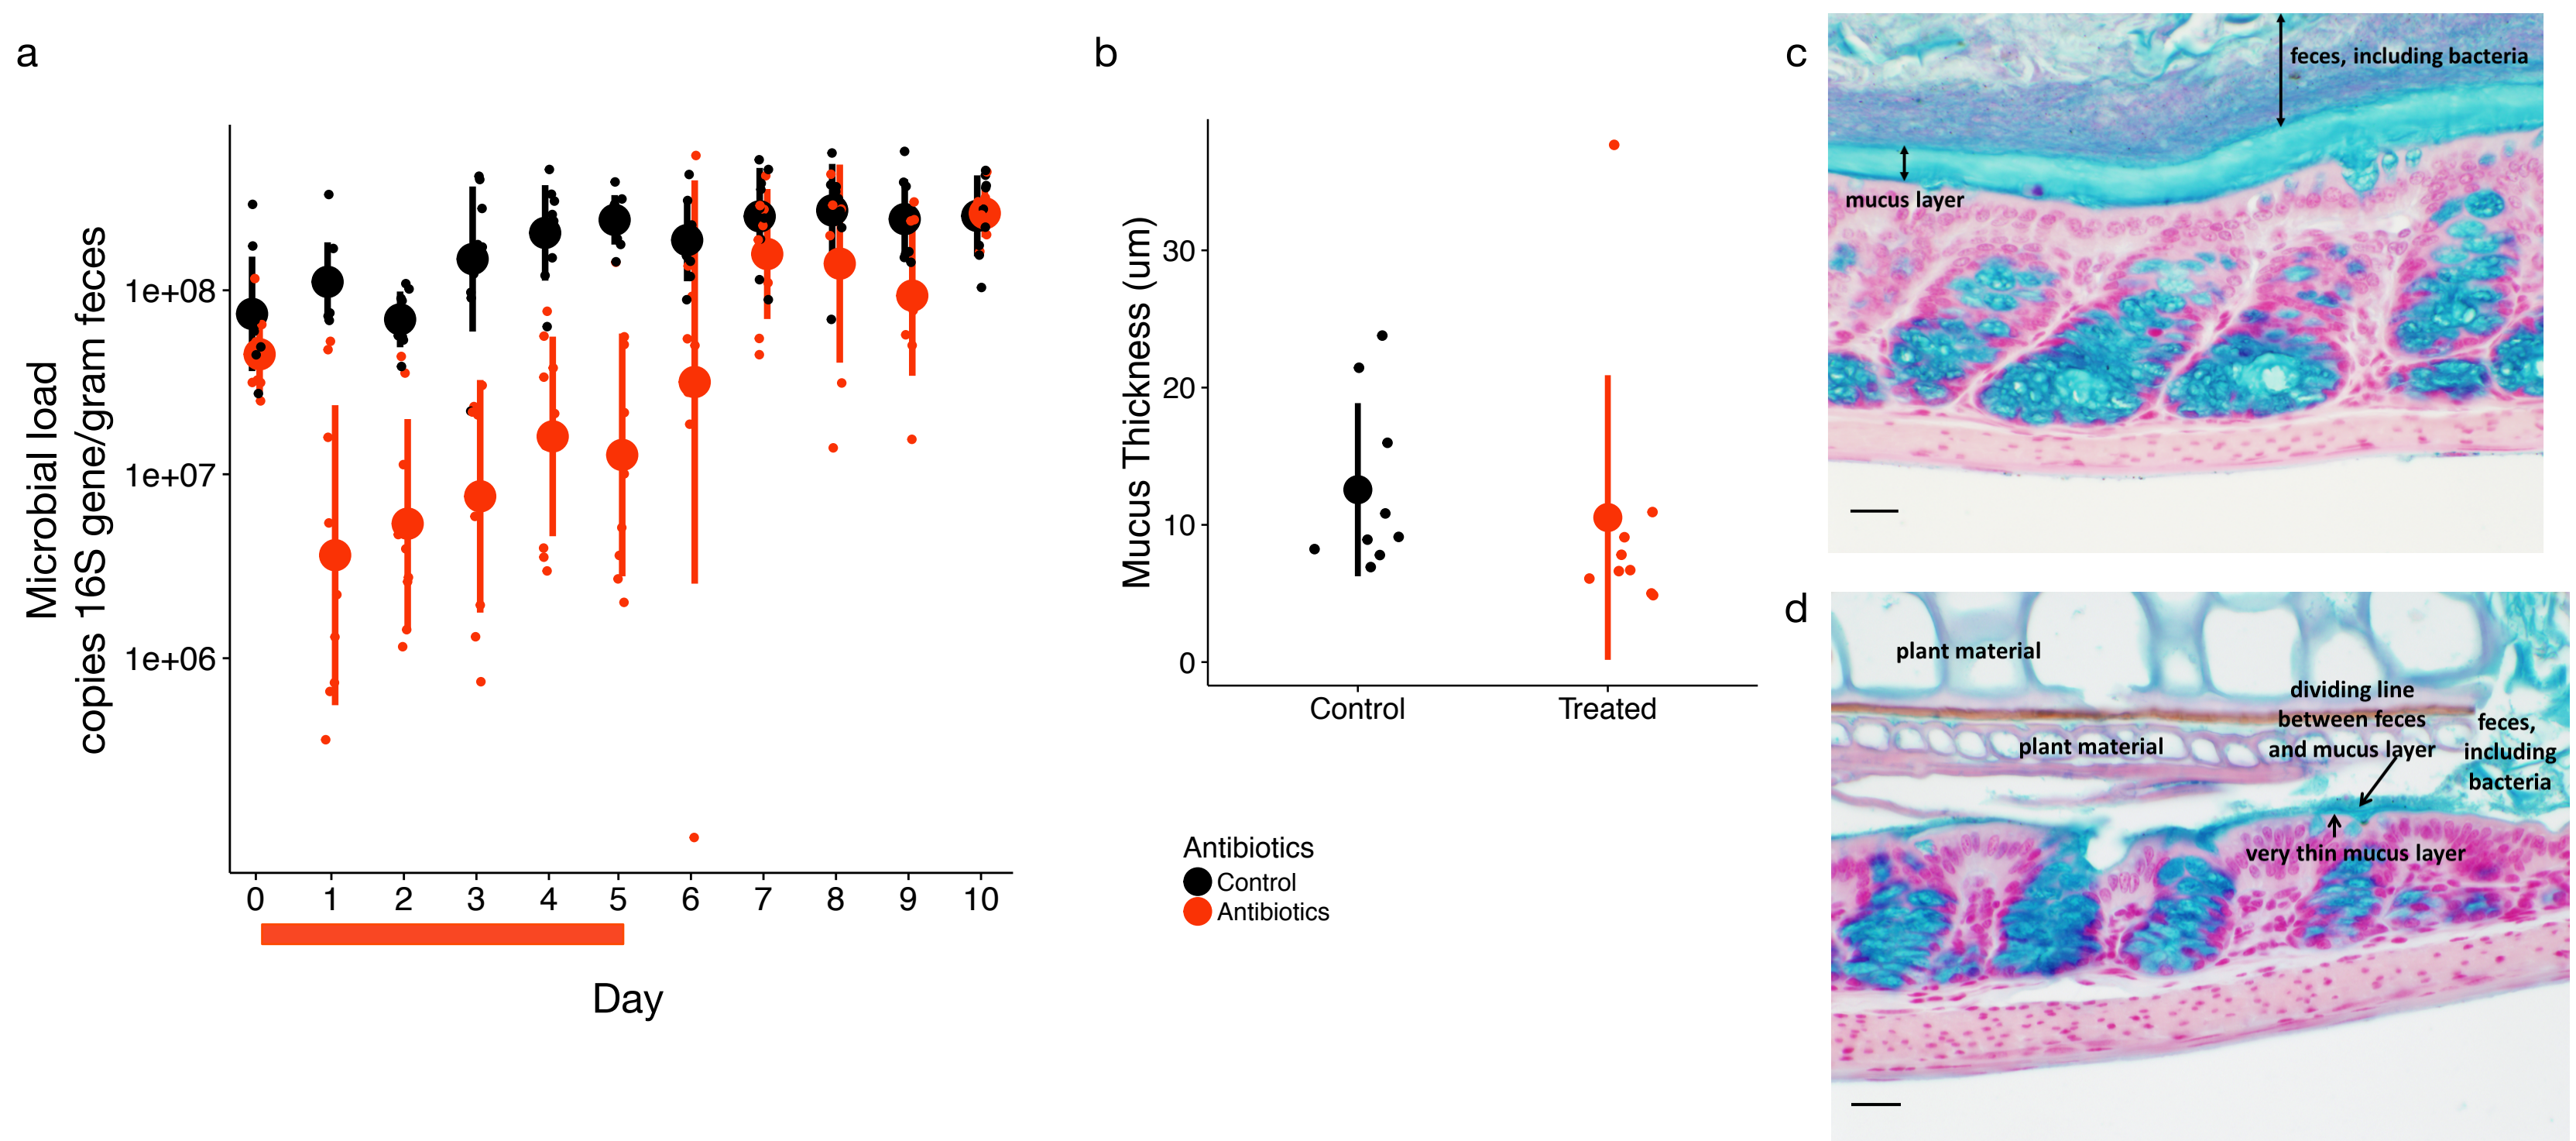

**Supplementary Figure 3 | Antibiotic treatment affects gut microbial load and mucus thickness.** **a**, Antibiotics produce a significant decrease in microbial load during the 5 day treatment course ( $P=9.14 \times 10^{-6}$ , linear mixed effects model likelihood test;  $n=9-10$  mice per treatment group), after which microbial load converged between treated and un-treated mice. Microbial load was measured as 16S rRNA gene copy number per gram feces extracted with qPCR detection limits between  $\sim 10^4$  and  $\sim 10^9$ . **b-d**, Mucus thickness was measured on Carnoy's fixed mouse gut sections stained with Alcian blue after 5 days of treatment. Blinded measurements of an intact AB-stained layer immediately overlying the colonic epithelium, which we believe based on previous literature to represent the inner mucus layer, revealed a trend toward thinner mucus in antibiotics treated mice ( $P=0.09$ , Mann-Whitney U test;  $n=9$  mice per treatment group; **b**). However, we did not attempt to measure the thickness of the more amorphous and bacterial-laden outer mucus layer. Representative images for control (**c**) and antibiotic treated (**d**) mice include a  $20\mu\text{m}$  scale bar. Images were prepared for all samples ( $N=18$ ). See Supplementary Information Table 7 for individual measurements of mucus thickness. Red bar under the x-axis indicate the course of antibiotics. Large circles are means; bars show standard deviations.



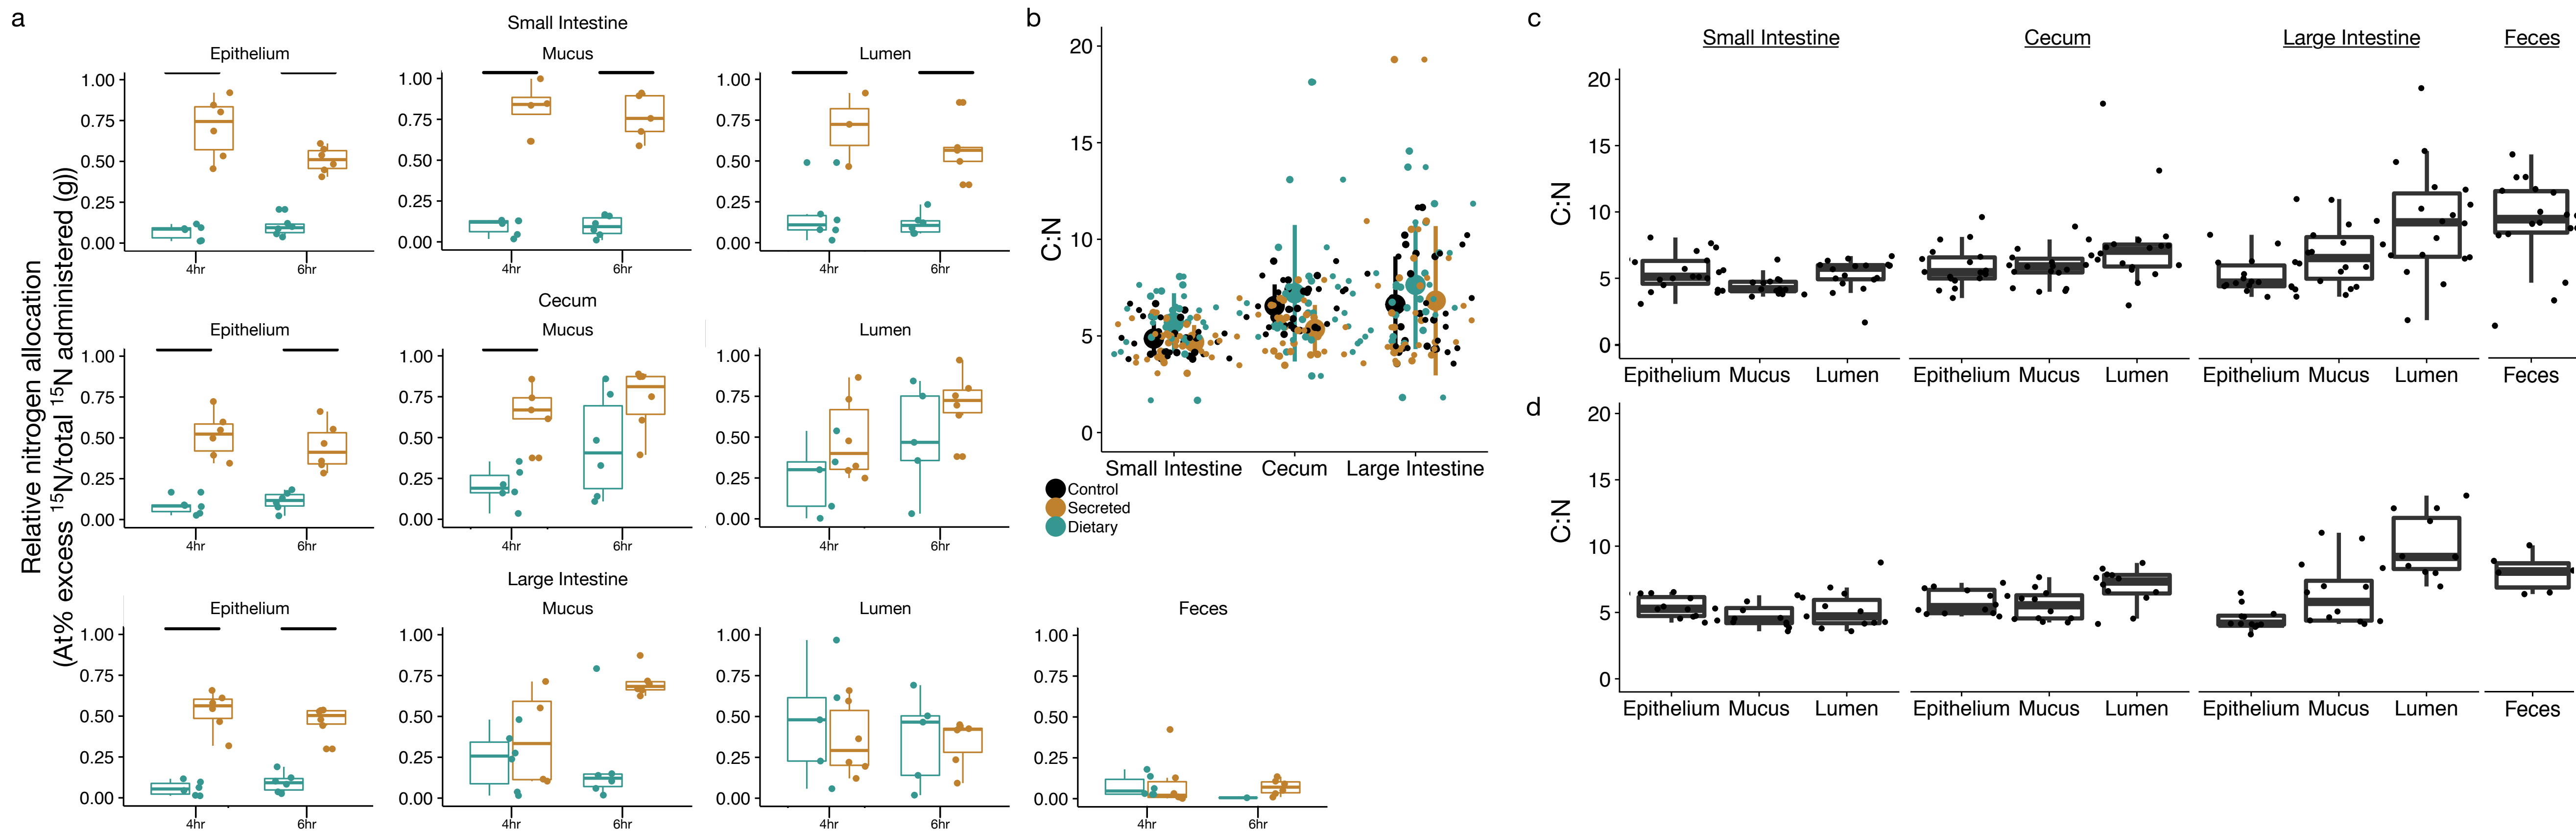

**Supplementary Figure 4 | Labeled nitrogen from both host diet and host secretions was delivered to the gut and made available to the microbiota without changing nitrogen availability.** **a**, Isotopic enrichment delivery to the gut was demonstrated throughout the gut after four and six hours. Bars indicate difference between treatments ( $P < 0.05$ , Bonferroni-corrected Mann-Whitney U tests (see Supplementary Information Table 8 for exact p-values);  $n = 6$  per treatment group). **b**, C:N did not vary between treatments ( $P = 0.13$ , Bonferroni-corrected Kruskal-Wallis test), indicating the treatments did not change overall nitrogen availability. **c-d**, However, C:N does vary between compartment (small intestine, cecum, large intestine, feces) and among tissue layers within each compartment (epithelium, mucus, lumen) ( $P < 0.05$ , Bonferroni-corrected Kruskal-Wallis tests (see Supplementary Information Table 9 for exact p-values);  $n = 12-18$  per section) after 4 (**c**) and 6 (**d**) hours. Large circles are means; bars show standard deviations. Boxplots indicate medians and quartiles; whiskers show  $1.5 \times$  interquartile range.

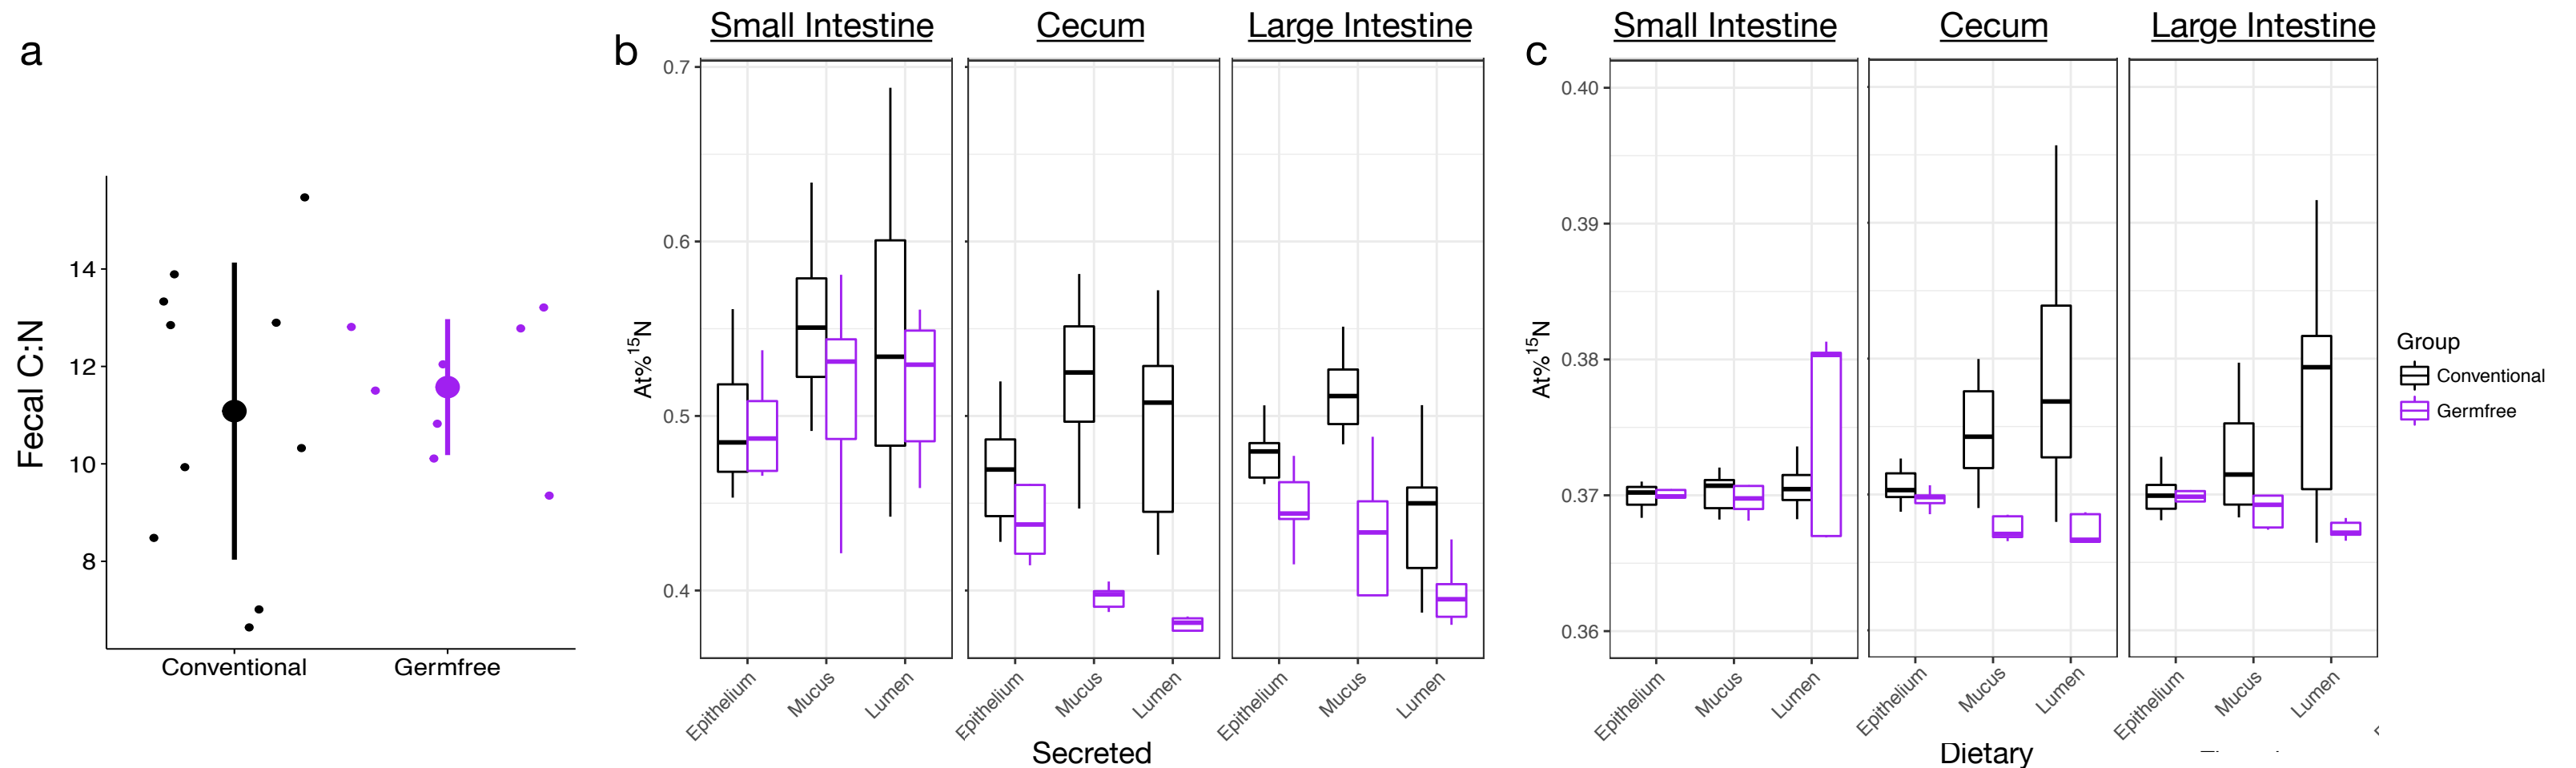

**Supplementary Figure 5 | Nitrogen allocation patterns in germfree mice.** **a**, Fecal C:N did not differ between conventional and germfree mice ( $P=0.9$ , Mann-Whitney U test;  $n=8-10$  mice per group). **b-c**, Atom percent enrichment (*i.e.*, the proportional representation of the heavy isotope times 100) four hours following stable isotope tracer delivery via injection (*i.e.*, host secreted; **b**) or host diet (**c**) differed between germfree and conventional mice ( $P=0.0007$  and  $P=0.0261$ , respectively, mixed-model ANOVAs;  $n=6$  per treatment group). Large circles are means; bars indicate standard deviation. Boxplots indicate medians and quartiles; whiskers show  $1.5 \times$  interquartile range.

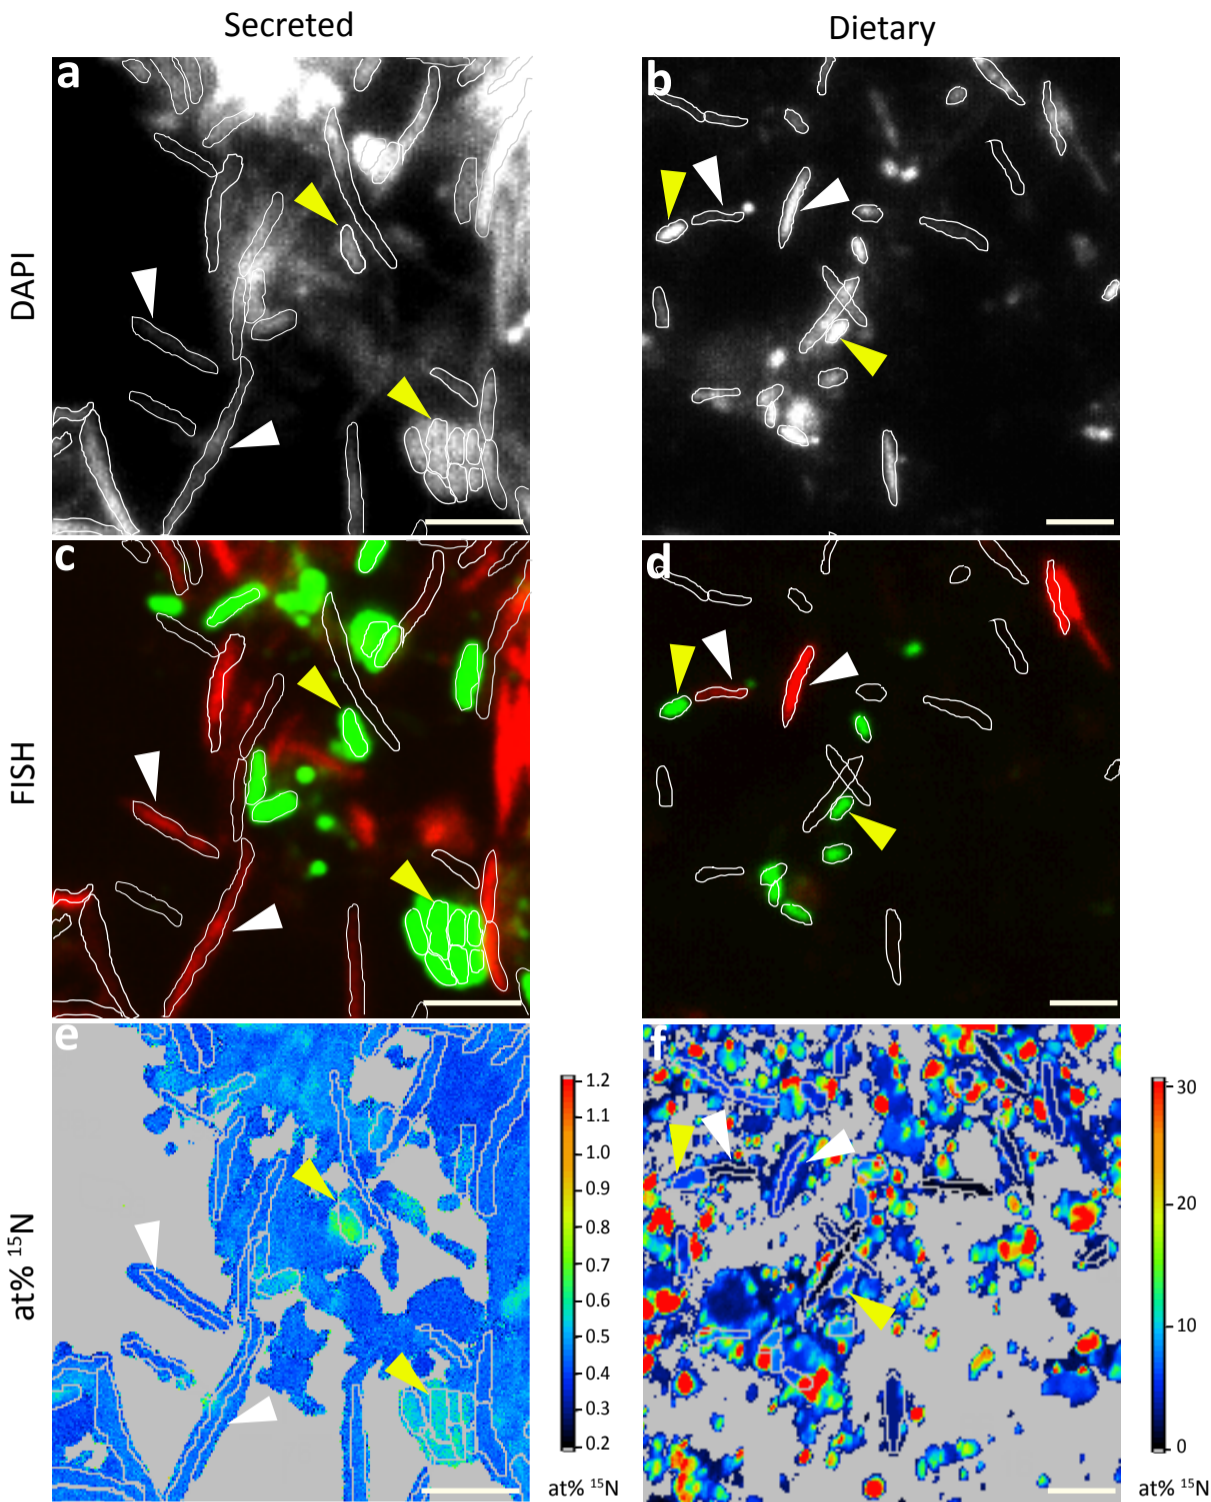

**Supplementary Figure 6 | Representative NanoSIMS/FISH analysis of large intestine microbiota from mice fed a  $^{15}\text{N}$  labeled spirulina diet or injected with  $^{15}\text{N}/^{13}\text{C}$  labeled threonine. a-d**, Large intestine contents were stained with the nucleic acid dye DAPI (gray) and hybridized with the FISH Bac303 (green) and Erec482 (red) probes to visualize bacterial cells of particular taxa (see Supplementary Table 3). **e-f**, NanoSIMS at%  $^{15}\text{N}$  distribution maps of the same fields of view for secreted  $^{15}\text{N}$  (**e**) and dietary  $^{15}\text{N}$  (**f**) are shown. Yellow arrowheads point to higher enrichment levels detected for Bac303 positive cells in comparison with Erec482 positive cells, which are indicated by white arrowheads. All measured bacterial cells are outlined in grey, for easier visualization. Grey background areas (**e-f**) refer to pixels where an unbiased at% visualization is not feasible due to weak C2- and CN-secondary ion signal intensities (ITO surface without biomass). Scale bar = 5  $\mu\text{m}$ . Images were prepared for all samples prepared for NanoSIMS (n=6).

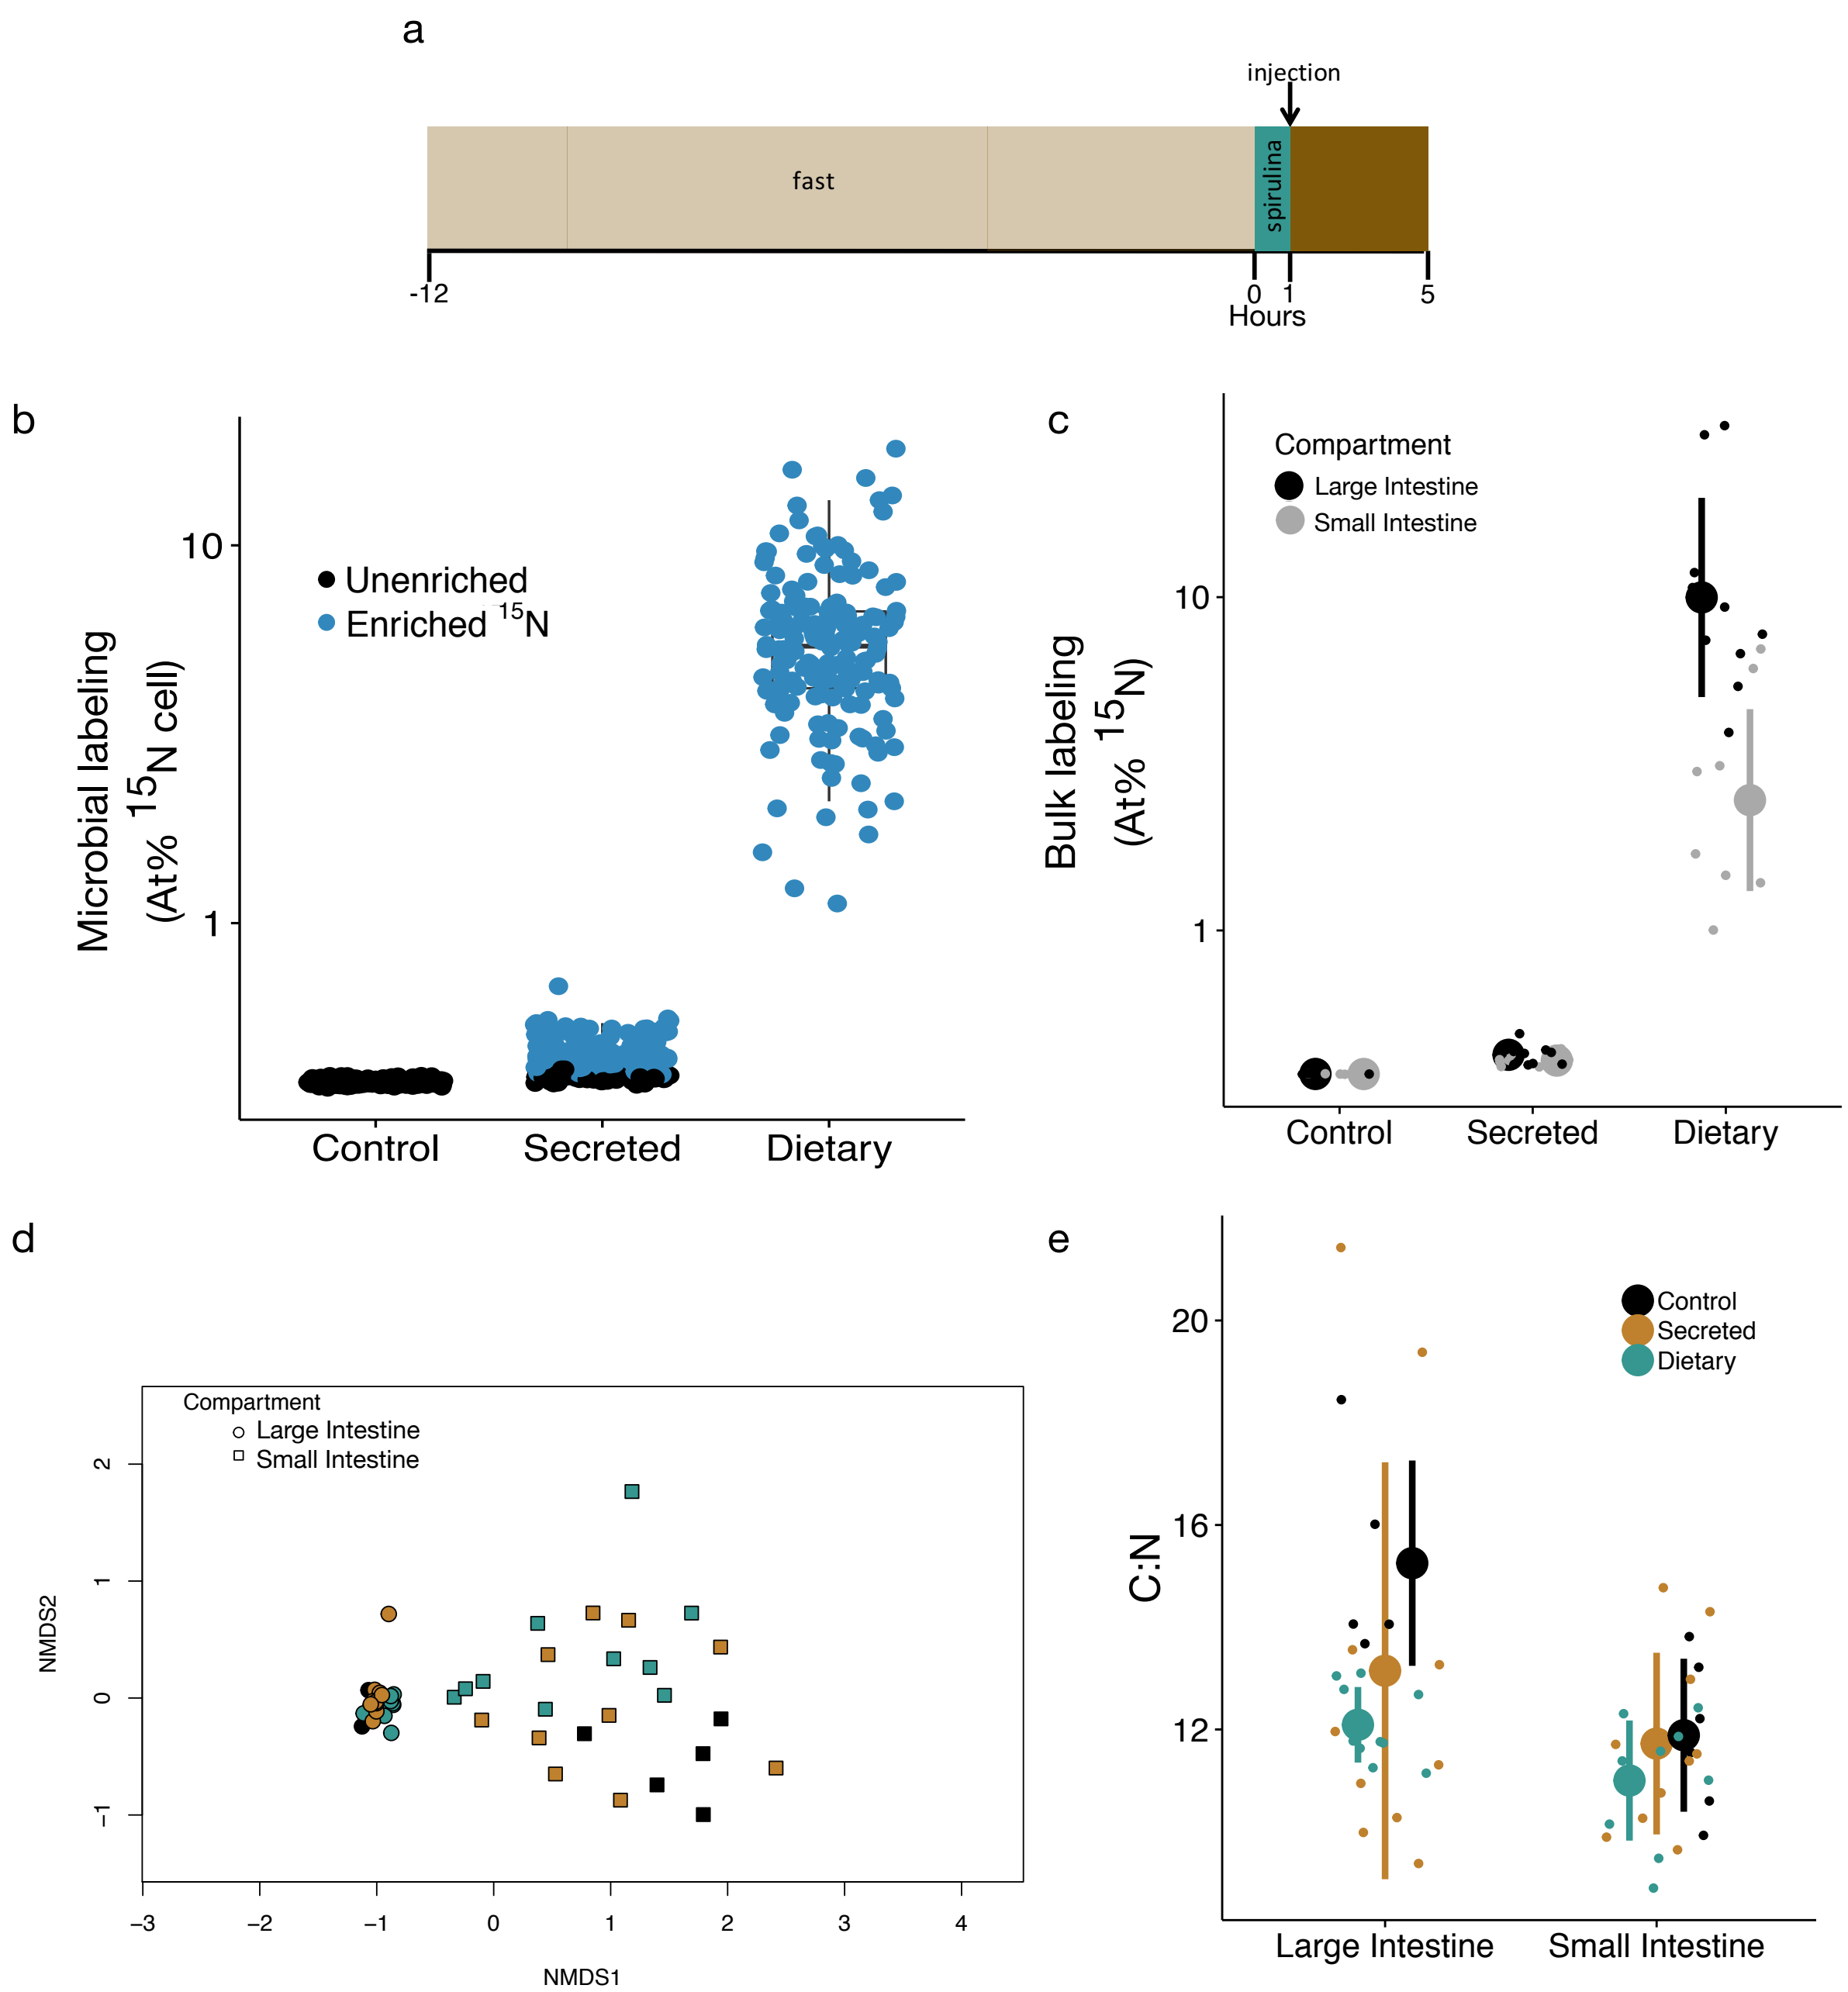

**Supplementary Figure 7 | Labeled nitrogen from both host diet and host secretions did not change nitrogen availability or composition but was taken up by the microbiota.** **a**, Experimental setup for single cell studies: mice were fasted overnight and then offered chow with all protein sourced from Spirulina cells (either  $^{14}\text{N}$  for control and secreted groups or  $^{15}\text{N}$  for dietary group) for one hour before being returned to normal mouse chow for four hours before euthanasia. Control and secreted-group mice received an injection of threonine ( $^{14}\text{N}$  and  $^{15}\text{N}$  respectively) before being returned to normal chow. **b-c**, The diet manipulation produced the greatest overall  $^{15}\text{N}$  enrichment of microbial cells ( $P < 2.2 \times 10^{-16}$ , Bonferroni-corrected Mann-Whitney U tests;  $n = 2$  mice per treatment,  $n = 78-185$  cells per treatment, **b**) likely due to much greater label uptake during feeding, but both interventions resulted in significant overall enrichment relative to controls with no significant differences between intestinal compartments (colors;  $P = 0.16$ , Mann-Whitney U test,  $n = 5-10$  mice per treatment; **c**). **d**, The experimental treatments (colors) did not significantly affect microbial taxonomic composition ( $P = 0.09$ ) as assessed by 16S rRNA gene amplicon sequencing but taxonomic composition did differ significantly between gut compartments (shapes;  $P = 0.001$ , PERMANOVA;  $n = 5-10$  mice per treatment). **e**, The experimental treatments did not affect gut content C:N ( $P = 0.09$ ), but C:N did vary between intestinal compartments ( $P = 0.02$ , Mann-Whitney U test;  $n = 5-10$  mice per treatment). Large circles are means; bars show standard deviations.



Supplementary Table 1: Gut isolate C:N. For isolates with more than one clonal population measured (N>1) C:N reported is the mean.

| Species                             | Phylum          | N | Source      | C:N  |
|-------------------------------------|-----------------|---|-------------|------|
| <i>Collinsella aerofaciens</i>      | Actinobacteria  | 1 | Human donor | 4.1  |
| <i>Eggerthella centa</i>            | Actinobacteria  | 1 | Human donor | 3.99 |
| <i>Bacteroides massiliensis</i>     | Bacteroidetes   | 1 | Human donor | 4.58 |
| <i>Bacteroides ovatus</i>           | Bacteroidetes   | 4 | Human donor | 3.95 |
| <i>Bacteroides thetaiotaomicron</i> | Bacteroidetes   | 1 | Human donor | 4.28 |
| <i>Bacteroides uniformis</i>        | Bacteroidetes   | 1 | Human donor | 4.07 |
| <i>Bacteroides vulgatus</i>         | Bacteroidetes   | 1 | Human donor | 4.22 |
| <i>Bacillus coccae</i>              | Firmicutes      | 1 | Human donor | 4.33 |
| <i>Clostridium bartlettii</i>       | Firmicutes      | 1 | Human donor | 3.85 |
| <i>Clostridium innocuum</i>         | Firmicutes      | 1 | Human donor | 4.02 |
| <i>Clostridium innocuum</i>         | Firmicutes      | 1 | Human donor | 3.84 |
| <i>Clostridium sp.</i>              | Firmicutes      | 1 | Human donor | 4.17 |
| <i>Clostridium sp.</i>              | Firmicutes      | 1 | Human donor | 4.55 |
| <i>Clostridium sp.</i>              | Firmicutes      | 1 | Human donor | 3.65 |
| <i>Clostridium sp.</i>              | Firmicutes      | 1 | Human donor | 4.31 |
| <i>Coprococcus comes</i>            | Firmicutes      | 1 | Human donor | 3.98 |
| <i>Dorea formicigenens</i>          | Firmicutes      | 1 | Human donor | 4.1  |
| <i>Dorea formigamerans</i>          | Firmicutes      | 1 | Human donor | 4.41 |
| <i>Dorea longicatena</i>            | Firmicutes      | 1 | ATCC        | 3.97 |
| <i>Dorea longicatena</i>            | Firmicutes      | 1 | Human donor | 3.78 |
| <i>Enterococcus faecalis</i>        | Firmicutes      | 4 | Human donor | 3.94 |
| <i>Enterococcus faecalis</i>        | Firmicutes      | 1 | Human donor | 4.28 |
| <i>Enterococcus faecalis</i>        | Firmicutes      | 1 | Human donor | 3.88 |
| <i>Ruminococcus gnavus</i>          | Firmicutes      | 1 | Human donor | 3.76 |
| <i>Ruminococcus gnavus</i>          | Firmicutes      | 1 | Human donor | 3.92 |
| <i>Ruminococcus productus</i>       | Firmicutes      | 1 | Human donor | 4.2  |
| <i>Ruminococcus torques</i>         | Firmicutes      | 1 | Human donor | 3.62 |
| <i>Streptococcus salivarius</i>     | Firmicutes      | 1 | Human donor | 3.98 |
| <i>Streptococcus salivarius</i>     | Firmicutes      | 1 | Human donor | 3.85 |
| <i>Streptococcus salivarius</i>     | Firmicutes      | 1 | Human donor | 3.97 |
| <i>Enterobacter cloacae</i>         | Proteobacteria  | 1 | Human donor | 4.02 |
| <i>Raoultella ornithinolytica</i>   | Proteobacteria  | 1 | Human donor | 4.28 |
| <i>Raoultella ornithinolytica</i>   | Proteobacteria  | 1 | Human donor | 4.12 |
| <i>Shigella flexneri</i>            | Proteobacteria  | 1 | Human donor | 3.8  |
| <i>Akkermansia muciphila</i>        | Verrucomicrobia | 4 | ATCC        | 4.49 |



## Supplementary Table 2: Mammals included in fecal C:N analyses

| Common name               | Species                             | N  | Diet      | Gut morphology  | Large intestine length (cm) | Length source | Collection locale | Population |
|---------------------------|-------------------------------------|----|-----------|-----------------|-----------------------------|---------------|-------------------|------------|
| Dog                       | <i>Canis lupus familiaris</i>       | 5  | Carnivore | simple          | 68                          | 54            | USA               | Captive    |
| Aye-aye                   | <i>Daubentonia madagascariensis</i> | 4  | Carnivore | simple          |                             |               | USA               | Captive    |
| White-tailed Mongoose     | <i>Ichneumia albicauda</i>          | 1  | Carnivore | simple          |                             |               | Kenya             | Wild       |
| Aardwolf                  | <i>Proteles cristatus</i>           | 1  | Carnivore | simple          | 48.81                       | 52            | Kenya             | Wild       |
| Meerkat                   | <i>Suricata suricatta</i>           | 9  | Carnivore | simple          |                             |               | South Africa      | Wild       |
| Impala                    | <i>Aepyceros melampus</i>           | 10 | Herbivore | hindgut         |                             |               | Kenya             | Wild       |
| Southern White Rhinoceros | <i>Ceratotherium simum</i>          | 5  | Herbivore | hindgut         |                             |               | Kenya             | Wild       |
| Eastern Black Rhinoceros  | <i>Diceros bicornis</i>             | 7  | Herbivore | hindgut         | 550.73                      | 52            | Kenya             | Wild       |
| Horse                     | <i>Equus ferus caballus</i>         | 4  | Herbivore | hindgut         | 747                         | 54            | USA               | Captive    |
| Grevy's Zebra             | <i>Equus grevyi</i>                 | 9  | Herbivore | hindgut         |                             |               | Kenya             | Wild       |
| Plains Zebra              | <i>Equus quagga</i>                 | 10 | Herbivore | hindgut         | 532.35                      | 52            | Kenya             | Wild       |
| Crested Porcupine         | <i>Hystrix cristata</i>             | 2  | Herbivore | hindgut         | 59.88                       | 52            | Kenya             | Wild       |
| Snowshoe hare             | <i>Lepus americanus</i>             | 15 | Herbivore | hindgut         | 144.03                      | 52            | USA               | Captive    |
| Elephant                  | <i>Loxodonta africana</i>           | 10 | Herbivore | hindgut         | 867.9                       | 52            | Kenya             | Wild       |
| Prairie Vole              | <i>Microtus ochrogaster</i>         | 10 | Herbivore | hindgut         | 25.44                       | 52            | USA               | Captive    |
| Rock Hyrax                | <i>Procavia habessinica</i>         | 2  | Herbivore | hindgut         | 74                          | 52            | Kenya             | Wild       |
| Hippopotamus              | <i>Hippopotamus amphibius</i>       | 5  | Herbivore | pseudo-ruminant | 306.08                      | 52            | Kenya             | Wild       |
| Cattle                    | <i>Bos indicus</i>                  | 10 | Herbivore | ruminant        | 1106                        | 54            | Kenya             | Captive    |
| Cow                       | <i>Bos taurus</i>                   | 10 | Herbivore | ruminant        |                             |               | USA               | Captive    |
| Giraffe                   | <i>Giraffa camelopardalis</i>       | 5  | Herbivore | ruminant        | 2383                        | 53            | Kenya             | Wild       |
| Waterbuck                 | <i>Kobus ellipsiprymnus</i>         | 1  | Herbivore | ruminant        |                             |               | Kenya             | Wild       |
| Gunther's Dik-dik         | <i>Madoqua guentheri</i>            | 10 | Herbivore | ruminant        | 149.55                      | 52            | Kenya             | Wild       |
| Sheep                     | <i>Ovis aries</i>                   | 10 | Herbivore | ruminant        | 558.16                      | 52            | USA               | Captive    |
| Cape Buffalo              | <i>Syncerus caffer</i>              | 10 | Herbivore | ruminant        |                             |               | Kenya             | Wild       |
| Mouse                     | <i>Mus musculus</i>                 | 10 | Omnivore  | hindgut         | 7.41                        | 55            | USA               | Captive    |
| Warthog                   | <i>Phacochoerus africanus</i>       | 6  | Omnivore  | hindgut         |                             |               | Kenya             | Wild       |
| Vervet Monkey             | <i>Cercopithecus pygerythrus</i>    | 1  | Omnivore  | simple          | 85.59                       | 52            | Kenya             | Wild       |
| Human                     | <i>Homo sapiens</i>                 | 5  | Omnivore  | simple          | 137.73                      | 52            | USA               | Wild       |
| Grey Mouse Lemur          | <i>Microcebus murinus</i>           | 8  | Omnivore  | simple          |                             |               | USA               | Captive    |
| Yellow Baboon             | <i>Papio cynocephalus</i>           | 8  | Omnivore  | simple          | 259.39                      | 52            | Kenya             | Wild       |

## Supplementary Table 3: FISH probes for single cell stable isotope analyses

| Probe Name | Probe sequence (5'→3')    | Total hits <sup>a</sup> | Major target taxa (coverage %, total hits in taxon) <sup>a</sup>                                                                                                                           | Total non-target hits <sup>a</sup> | References |
|------------|---------------------------|-------------------------|--------------------------------------------------------------------------------------------------------------------------------------------------------------------------------------------|------------------------------------|------------|
| Erec482    | GCT TCT TAG TCA RGT ACC G | 95259                   | Order <i>Clostridiales</i> (32.2%, 94787)<br>Family <i>Lachnospiraceae</i> (70.2%, 93102)                                                                                                  | 2157                               | 71         |
| Bac303     | CCA ATG TGG GGG ACC TT    | 109363                  | Order <i>Bacteroidales</i> (55.9%, 108561)<br>Family <i>Bacteroidaceae</i> (91.5%, 56850)<br>Family <i>Porphyromonadaceae</i> (17.1%, 8502)<br>Family <i>Prevotellaceae</i> (71.1%, 40124) | 802                                | 72         |

<sup>a</sup> According to RDP probe match, performed with database release 11, Update 4 (26 December 2015), containing 3224600 bacterial and archaeal 16S rRNA sequences (<https://rdp.cme.msu.edu/>). Coverage is the percentage of sequences within the RDP target taxon that shows a full match to the probe sequence. The number of nontarget hits indicates the total number of sequences outside the respective RDP taxa that show a full match to the probe sequence.

Supplementary Table 5: Genus level absolute abundance (calculated as relative abundance values multiplied by 16S copy number measured via qPCR) responses to dietary intervention at the end of two weeks. Uncorrected and Bonferroni-corrected p-values are reported for Kruskal-Wallis tests of treatment effects. Only genera with an average abundance of at least 0.5% and at least one sample with greater than 1% abundance were included.

| Phylum             | Order                                 | Genus                             | 6% Protein Diet |          | 20% Protein Diet |          | 40% Protein Diet |          | p-value       | adjusted p-value |
|--------------------|---------------------------------------|-----------------------------------|-----------------|----------|------------------|----------|------------------|----------|---------------|------------------|
|                    |                                       |                                   | mean            | SD       | mean             | SD       | mean             | SD       |               |                  |
| Bacteroidetes      | Bacteroidales                         | <i>Bacteroides</i>                | 5.84E+06        | 1.04E+07 | 2.18E+07         | 2.75E+07 | 4.40E+07         | 5.44E+07 | <b>0.0550</b> | 1                |
|                    |                                       | <i>Parabacteroides</i>            | 1.09E+07        | 1.86E+07 | 4.18E+07         | 4.60E+07 | 5.44E+07         | 4.05E+07 | <b>0.0090</b> | 0.1710           |
|                    |                                       | Rickenellaceae genus unspecified  | 1.80E+05        | 2.99E+05 | 6.24E+05         | 5.28E+05 | 6.50E+05         | 5.75E+05 | <b>0.0138</b> | 0.2622           |
|                    |                                       | S24-7 genus unspecified           | 1.11E+07        | 2.26E+07 | 1.35E+07         | 2.97E+07 | 9.64E+06         | 2.89E+07 | 0.1459        | 1                |
| Deferribacteres    | Deferribacterales                     | Mucispirillum                     | 7.23E+05        | 1.26E+06 | 1.25E+06         | 1.58E+06 | 4.87E+05         | 8.29E+05 | 0.3727        | 1                |
| Firmicutes         | Lactobacillales                       | <i>Lactobacillus</i>              | 3.21E+05        | 6.08E+05 | 5.93E+06         | 1.50E+07 | 1.12E+07         | 1.12E+07 | <b>0.0005</b> | <b>0.0095</b>    |
|                    |                                       | <i>Lactococcus</i>                | 3.05E+05        | 2.82E+05 | 1.41E+06         | 1.49E+06 | 6.03E+06         | 6.32E+06 | <b>0.0243</b> | 0.4617           |
|                    | Clostridiales                         | Family unspecified                | 7.79E+06        | 9.10E+06 | 1.40E+07         | 1.25E+07 | 1.83E+07         | 1.53E+07 | 0.4173        | 1                |
|                    |                                       | <i>SMB53</i>                      | 1.02E+06        | 9.50E+05 | 2.06E+06         | 5.11E+06 | 3.77E+06         | 5.37E+06 | 0.2105        | 1                |
|                    |                                       | Lachnospiraceae genus unspecified | 1.35E+06        | 1.12E+06 | 1.74E+06         | 1.62E+06 | 2.55E+06         | 2.74E+06 | 0.7240        | 1                |
|                    |                                       | <i>Dorea</i>                      | 4.17E+05        | 5.28E+05 | 5.48E+05         | 6.52E+05 | 4.63E+06         | 6.41E+06 | 0.0683        | 1                |
|                    |                                       | <i>rc4-4</i>                      | 7.37E+06        | 1.17E+07 | 9.74E+06         | 8.48E+06 | 2.09E+07         | 2.18E+07 | 0.1101        | 1                |
|                    |                                       | Ruminococcaceae genus unspecified | 2.77E+06        | 3.11E+06 | 5.61E+06         | 5.04E+06 | 7.36E+06         | 5.70E+06 | 0.0841        | 1                |
|                    |                                       | <i>Oscillospira</i>               | 2.51E+06        | 2.29E+06 | 1.09E+07         | 1.23E+07 | 1.13E+07         | 9.10E+06 | 0.0616        | 1                |
|                    |                                       | <i>Ruminococcus</i>               | 6.50E+05        | 6.33E+05 | 2.26E+06         | 2.54E+06 | 1.12E+07         | 2.36E+07 | <b>0.0065</b> | 0.1235           |
| Erysipelotrichales | Erysipelotrichaceae genus unspecified | 3.42E+05                          | 4.53E+05        | 4.14E+05 | 2.99E+05         | 1.55E+06 | 2.67E+06         | 0.0659   | 1             |                  |
|                    | [ <i>Eubacterium</i> ]                | 2.00E+05                          | 3.79E+05        | 5.43E+05 | 1.35E+06         | 3.37E+06 | 9.02E+06         | 0.1909   | 1             |                  |
| Tenericutes        | RF39                                  | Family unspecified                | 5.21E+05        | 9.81E+05 | 1.08E+06         | 1.25E+06 | 1.97E+06         | 2.53E+06 | 0.1371        | 1                |
| Verrucomicrobia    | Verrucomicrobiales                    | <i>Akkermansia</i>                | 4.22E+06        | 5.80E+06 | 1.51E+07         | 2.13E+07 | 5.13E+07         | 7.10E+07 | 0.2481        | 1                |

Supplementary Table 6: Select nutrient data for experimental mouse diets including primary protein and carbohydrate sources.

| <b>Diet Name</b> | <b>Protein<br/>(% by weight)</b> | <b>Casein (g/kg)</b> | <b>Carbohydrate<br/>(% by weight)</b> | <b>Sucrose<br/>(g/kg)</b> | <b>Cellulose<br/>(g/kg)</b> | <b>Fat<br/>(% by weight)</b> | <b>Calcium<br/>(% by weight)</b> | <b>Phosphorous<br/>(% by weight)</b> | <b>Kcal/g</b> |
|------------------|----------------------------------|----------------------|---------------------------------------|---------------------------|-----------------------------|------------------------------|----------------------------------|--------------------------------------|---------------|
| <b>TD.90016</b>  | 6.1                              | 69.00                | 75.6                                  | 571.80                    | 57.82                       | 5.5                          | 0.7                              | 0.54                                 | 3.8           |
| <b>TD.91352</b>  | 20.3                             | 230.00               | 61.6                                  | 431.70                    | 37.86                       | 5.5                          | 0.7                              | 0.54                                 | 3.8           |
| <b>TD.90018</b>  | 40.0                             | 460.00               | 41.6                                  | 231.82                    | 15.00                       | 5.5                          | 0.7                              | 0.54                                 | 3.8           |



Supplementary Table 7: Mean mucus thickness measurements for antibiotics experiment—data presented in Extended Data 3b.

| Mouse | Antibiotics | Thickness (um) $\pm$ SD | Measurements (N) |
|-------|-------------|-------------------------|------------------|
| 1     | N           | 10.8 $\pm$ 6.4          | 9                |
| 2     | N           | 7.8 $\pm$ 0.1           | 7                |
| 3     | N           | 8.9 $\pm$ 3.7           | 7                |
| 4     | N           | 6.9 $\pm$ 1.7           | 9                |
| 5     | N           | 16.0 $\pm$ 6.5          | 10               |
| 6     | N           | 21.5 $\pm$ 16.1         | 10               |
| 7     | N           | 9.1 $\pm$ 3.2           | 6                |
| 8     | N           | 8.2 $\pm$ 3.0           | 9                |
| 9     | N           | 23.8 $\pm$ 9.3          | 10               |
| 1     | Y           | 37.7 $\pm$ 15.1         | 6                |
| 2     | Y           | 10.9 $\pm$ 4.4          | 10               |
| 3     | Y           | 6.7 $\pm$ 3.7           | 7                |
| 4     | Y           | 9.1 $\pm$ 2.0           | 6                |
| 5     | Y           | 5.0 $\pm$ 1.9           | 7                |
| 6     | Y           | 6.6 $\pm$ 3.2           | 10               |
| 7     | Y           | 7.8 $\pm$ 4.5           | 10               |
| 8     | Y           | 4.9 $\pm$ 1.8           | 8                |
| 9     | Y           | 6.1 $\pm$ 2.8           | 9                |

Supplementary Table 8: Bonferroni-corrected p-values for Mann-Whitney U tests to determine effect of labeling route (secreted or dietary) on isotopic enrichment in the gut. Significant effects in bold. Plots of enrichment values are in Supplementary Information Figure 4a.

| Hour | Layer      | Compartment     | Treatment effect p-value |
|------|------------|-----------------|--------------------------|
| 4    | Epithelium | Small Intestine | <b>0.0217</b>            |
| 4    | Mucus      | Small Intestine | <b>0.0217</b>            |
| 4    | Lumen      | Small Intestine | <b>0.0433</b>            |
| 6    | Epithelium | Small Intestine | <b>0.0217</b>            |
| 6    | Lumen      | Small Intestine | <b>0.0217</b>            |
| 6    | Mucus      | Small Intestine | <b>0.0217</b>            |
| 4    | Epithelium | Cecum           | <b>0.0217</b>            |
| 4    | Mucus      | Cecum           | <b>0.0217</b>            |
| 4    | Lumen      | Cecum           | 1                        |
| 6    | Epithelium | Cecum           | <b>0.0217</b>            |
| 6    | Mucus      | Cecum           | 1                        |
| 6    | Lumen      | Cecum           | 1                        |
| 4    | Epithelium | Large Intestine | <b>0.0217</b>            |
| 4    | Mucus      | Large Intestine | 1                        |
| 4    | Lumen      | Large Intestine | 1                        |
| 6    | Epithelium | Large Intestine | <b>0.0217</b>            |
| 6    | Mucus      | Large Intestine | 0.4100                   |
| 6    | Lumen      | Large Intestine | 1                        |
| 4    |            | Feces           | 1                        |
| 6    |            | Feces           | 1                        |

Supplementary Table 9: Bonferroni-corrected p-values for Kruskal-Wallis tests to determine effect of gut compartment and layer on C:N during isotopic enrichment studies. Significant effects in bold. Plots of C:N are in Supplementary Information Figure 4c, 4d.

| <b>Hour</b> | <b>Effect</b>           | <b>p-value</b>  |
|-------------|-------------------------|-----------------|
| 4           | Compartment             | 0.000006        |
| 4           | Layer                   | 0.000008        |
| 4           | Layer (small intestine) | <b>0.047180</b> |
| 4           | Layer (cecum)           | 0.750000        |
| 4           | Layer (large intestine) | <b>0.005007</b> |
| 6           | Compartment             | <b>0.008304</b> |
| 6           | Layer                   | <b>0.000295</b> |
| 6           | Layer (small intestine) | 1.000000        |
| 6           | Layer (cecum)           | 0.339200        |
| 6           | Layer (large intestine) | <b>0.000257</b> |
